# Supplementary material
Source: PubMed Central journal article supplement (PMC5350567)
Supplement: EMBJ-36-761-s001.pdf [file EMBJ-36-761-s001.pdf]

**Dalet et al.**

**Appendix table of contents**

|                                               |           |
|-----------------------------------------------|-----------|
| <b>- Appendix Figure S1</b>                   | <b>p1</b> |
| <b>- Appendix Figure S1 legend</b>            | <b>p2</b> |
| <b>- Appendix Table S1:</b>                   | <b>p3</b> |
| <b>- Appendix Table S2:</b>                   | <b>p4</b> |
| <b>- Supplementary Materials and Methods:</b> | <b>p5</b> |

## Supplementary figure S1

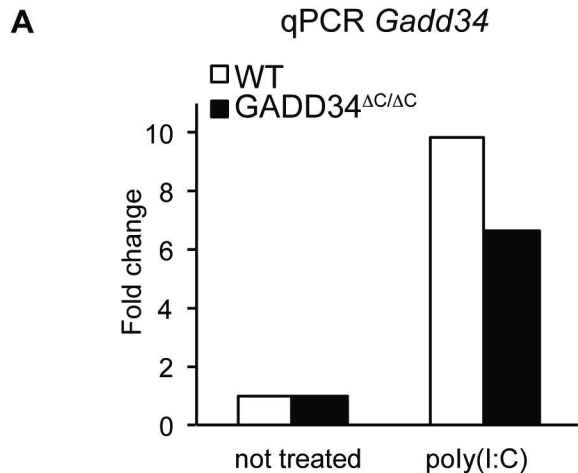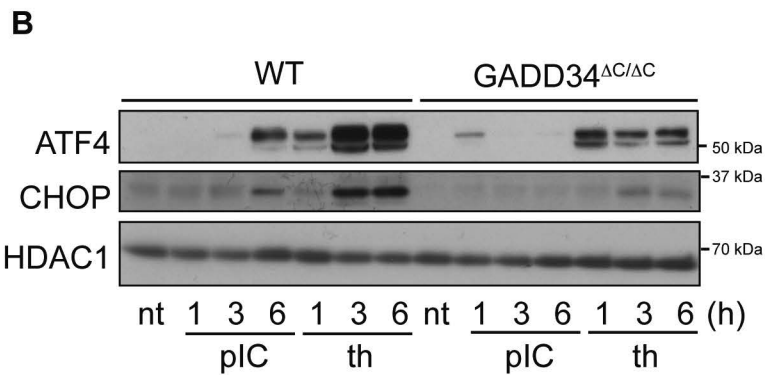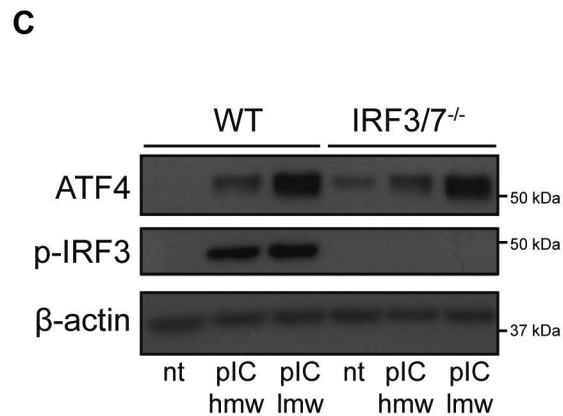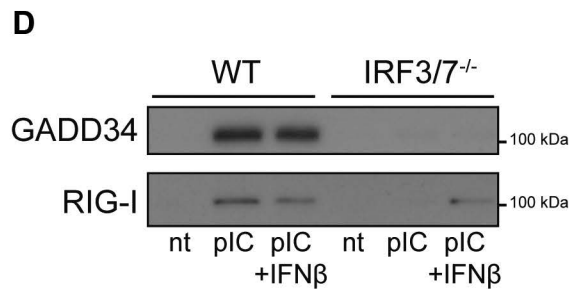

## Appendix figure legend

### Appendix Figure S1.

- A- Gadd34 mRNA was quantified by qPCR after 6h of HMW poly(I:C) treatment in WT and GADD34<sup>ΔC/ΔC</sup> MEFs. mRNA levels are expressed as fold change compared to untreated condition.
- B- WT and GADD34<sup>ΔC/ΔC</sup> MEFs were treated with HMW poly(I:C) (pIC) or thapsigargin (th) for 1, 3 and 6h. ATF4 and CHOP expression in nuclear extracts were detected by immunoblot. HDAC1 expression was used as equal loading control. (nt: non treated condition)
- C- WT and IRF3/7<sup>-/-</sup> MEFs were left untreated (nt), or treated with HMW- or LMW poly(I:C) for 6h. ATF4 and p-IRF3 levels in nuclear extracts were detected by immunoblot β-actin was used as equal loading control.
- D- WT and IRF3/7<sup>-/-</sup> MEFs were treated with HMW poly(I:C) during 8h in the presence or not of 1 ng/ml of recombinant mouse IFNβ. GADD34 and RIG-I expression were detected by immunoblot on whole cell lysates. Expression of RIG-I is used as a positive control of recombinant IFNβ effect.

## Appendix Table S1

| Common genes upregulated in WT and GADD34 <sup>ΔC/ΔC</sup> |              |               |          | Genes ONLY upregulated in WT |               |           |              | Genes ONLY upregulated in GADD34 <sup>ΔC/ΔC</sup> |           |               |          |
|------------------------------------------------------------|--------------|---------------|----------|------------------------------|---------------|-----------|--------------|---------------------------------------------------|-----------|---------------|----------|
| 1190002H23Rik                                              | Ddx58        | Hpx           | Parp14   | 0610040B10Rik                | Bst2          | Gm11517   | Hyal3        | Nfil3                                             | Sh3gl3    | 1110065H08Rik | Nr13     |
| 1810011O10Rik                                              | Ddx60        | Hsd17b13      | Parp9    | 1700055D18Rik                | Cacna1h       | Gm11563   | Icam1        | Nfkbb1                                            | Six1      | 1500012F01Rik | Nts      |
| 2310026L22Rik                                              | Dhx58        | Hsh2d         | Pdzrn4   | 1700094D03Rik                | Cap2          | Gm12185   | l04          | Ng23                                              | Slc16a9   | 1700091H14Rik | Olf512   |
| 2610018G03Rik                                              | Dtx3l        | I830012O16Rik | Phf11    | 1700125H20Rik                | Casp4         | Gm12250   | Ifi203       | Nlrc5                                             | Slc23a3   | 2610035D17Rik | Olf543   |
| 4921517L17Rik                                              | Dub1         | Ifi204        | Pmaip1   | 1810007D17Rik                | Ccdc81        | Gm12655   | Ifi35        | Nmi                                               | Slc25a22  | 4932438H23Rik | Paip1    |
| 4922505G16Rik                                              | Efnb3        | Ifi44         | Popdc2   | 2010002M12Rik                | Ccl1          | Gm13083   | Ifi47        | Nod2                                              | Slc2a6    | 4933416M07Rik | Pkd11    |
| 4930412F09Rik                                              | Egr1         | Ifih1         | Ppm1a    | 2010005H15Rik                | Ccrn4l        | Gm13105   | Ifi2         | Nppc                                              | Slfn10-ps | 4933437F05Rik | Plk3     |
| 4930488B22Rik                                              | Egr2         | Ifit1         | Pram1    | 2310001H17Rik                | Cd209g        | Gm13391   | Ifitm3       | Nrip1                                             | Slfn2     | 5830415F09Rik | Plscr2   |
| 8030451A03Rik                                              | Egr4         | Ifit3         | Ptpn22   | 2310042D19Rik                | Cd40          | Gm14137   | Ifitm6       | Nrip3                                             | Slfn9     | 9430008C03Rik | Prdm11   |
| 9130015A21Rik                                              | Errf1        | Ifna12        | Pvt1     | 3110043O21Rik                | Cfb           | Gm1966    | Ifna1        | Nub1                                              | Slpi      | 9530018H14Rik | Prm3     |
| A530032D15Rik                                              | Fam110c      | Ifna13        | Rasgef1b | 3230401D17Rik                | Ch25h         | Gm17019   | ligp1        | Nufip1                                            | Smcr8     | A430089I19Rik | Rad52    |
| A530040E14Rik                                              | Fam46a       | Ifna2         | Rbm43    | 4930459C07Rik                | Chka          | Gm17757   | ll15ra       | Oas1e                                             | Soat2     | A930027P06Rik | Relt     |
| Abcc8                                                      | Fam84b       | Ifna4         | Relb     | 4930512H18Rik                | Clec2d        | Gm1966    | ll28a        | Oas3                                              | Socs1     | Abr           | Rf4      |
| AC125149.2                                                 | Fcgr1        | Ifna5         | Rnd1     | 4930523C07Rik                | Clec2h        | Gm20627   | Impg2        | Ogdh                                              | Spr1a     | AC140325.4    | Rgs2     |
| AC132444.2                                                 | Fos          | Ifnab         | Rnf213   | 4930528F23Rik                | Ccl5          | Gm20665   | Inpp1        | Ogfr                                              | Spy2d1    | AC153928.3    | Rnd3     |
| AC133103.6                                                 | Frmr3        | Ifnb1         | Rsad2    | 4930599N23Rik                | Cln3          | Gm2582    | Ipo11        | Olf985                                            | Stfa211   | AC163653.5    | Sdk1     |
| AC168977.1                                                 | Gadd45a      | Igtp          | Rtp4     | 4933422A05Rik                | Cnksr1        | Gm3099    | lrak3        | Ovpg1                                             | Taf7      | AC168977.2    | Sele     |
| Acox1                                                      | Gbp2         | Il15          | Saa3     | 4933433H22Rik                | Creb3l4       | Gm3455    | lr2          | Oxct2b                                            | Tap1      | Aim1          | Sla      |
| Al607873                                                   | Gbp3         | Il5           | Samd7    | 4933439G12Rik                | Cxcl9         | Gm4107    | lr5          | P2rx7                                             | Tap2      | Angpt4        | Slc6a4   |
| AL592187.1                                                 | Gbp5         | Il6           | Samd9l   | 5430410E06Rik                | Cyct          | Gm4123    | lr8          | Padi4                                             | Tapbp     | Anxa13        | SNORD26  |
| Amhr2                                                      | Gbp7         | Irf1          | Sez6l    | 5830416P10Rik                | Cyp26c1       | Gm4134    | lrg1         | Parp12                                            | Tbc1d2    | BB287469      | Socs2    |
| Ankrd33b                                                   | Gem          | Irf7          | Sgms2    | 6230427J02Rik                | Cyth4         | Gm44      | lta6         | Pcdh8                                             | Tbx21     | BC061212      | Speer4b  |
| Apobec3                                                    | Gm11202      | Irf9          | Skor1    | 9130017N09Rik                | D730005E14Rik | Gm4632    | Jakmp1       | Pdcd1                                             | Tcstv3    | BE949265      | Syce1l   |
| Apol                                                       | Gm11274      | Irgm1         | Slc25a25 | 9330175E14Rik                | Daxx          | Gm4841    | Kdr          | Piwil4                                            | Tdrd7     | C2cd4b        | Taf1d    |
| Apol7a                                                     | Gm11545      | Irgm2         | Slfn8    | 9530082P21Rik                | Dcp2          | Gm4902    | Khdrbs1      | Plcx2d                                            | Tespa1    | Cdkn1a        | Tas2r104 |
| Apol7b                                                     | Gm11597      | Isg15         | Snhg12   | 9930023K05Rik                | Ddx24         | Gm4955    | Klf4         | Plekha4                                           | Tr3       | Crxos1        | Tnfaip2  |
| Apol7c                                                     | Gm11974      | Isg20         | snoR38   | 9930105H17Rik                | Dll1          | Gm4992    | Klkb1        | Plekha6                                           | Tm6sf1    | Cyp4f14       | Tnfsf15  |
| Apol9a                                                     | Gm13271      | Isoe2a        | SNORA71  | 9930111J21Rik2               | Dusp8         | Gm5431    | Krt16        | Plekhf2                                           | Tmem184a  | D130020L05Rik | Trim15   |
| Apol9b                                                     | Gm13272      | Itg6          | Sp140    | A530064D06Rik                | Duxbl         | Gm5483    | Lama3        | Plk2                                              | Tmem198   | Dusp1         | Tslp     |
| Arid5a                                                     | Gm13275      | Junb          | Stat1    | AA474408                     | Dync1h1       | Gm5595    | Lck          | Plip                                              | Tmem212   | E230008N13Rik | Zbtb46   |
| Atf3                                                       | Gm13280      | Klf6          | Stat2    | Abcb1a                       | Dync1i1       | Gm5622    | Lct          | Pml                                               | Tmem229b  | Esm1          | Zc3h12a  |
| AW011738                                                   | Gm13284      | Klk1b3        | Stx11    | AC074329.1                   | Dyrk3         | Gm5970    | Lgals3bp     | Pnpla7                                            | Tmprs2    | Fam102b       | Zfp423   |
| BC006779                                                   | Gm13286      | Klrb1a        | Tacr2    | AC122425.1                   | E330016A19Rik | Gm6264    | Lgals8       | Pnpt1                                             | Tnfsf10   | Fam36a        |          |
| BC049762                                                   | Gm14010      | Krt17         | Tex19.1  | AC132444.1                   | E330037I15Rik | Gm6401    | Lgals9       | Ppmlk                                             | Tnfsf18   | Fam59b        |          |
| Btbd16                                                     | Gm14446      | LOC100505112  | Tgif1    | AC211878.1                   | Efhb          | Gm8127    | Lif          | Prdm9                                             | Tor1aip1  | Fhad1         |          |
| Btg2                                                       | Gm15753      | Lpar3         | Tgtp1    | Adamts1                      | Ehd4          | Gm8815    | LOC100044874 | Prr5l                                             | Tor1aip2  | Gm12346       |          |
| C130026I21Rik                                              | Gm16340      | Ltb           | Tiparp   | Adar                         | Eif2ak2       | Gm8909    | LOC547349    | Tor3a                                             | Tor3a     | Gm13078       |          |
| Ccdc147                                                    | Gm16506      | March4        | Tlr2     | Agri                         | F3            | Gm9574    | LOC552877    | Psmb9                                             | Trem3     | Gm13180       |          |
| Ccl2                                                       | Gm4189       | Mir147        | Tmem140  | Ahr                          | F830016B08Rik | Gm9877    | LOC640793    | Psme2b-ps                                         | Trim12c   | Gm13496       |          |
| Ccl4                                                       | Gm4951       | Mnda          | Tnf      | Apobec1                      | Fam110b       | Gna13     | Lpxn         | Ptgs2                                             | Trim14    | Gm14636       |          |
| Ccl5                                                       | Gm5123       | Mndal         | Tnfaip3  | Apobec4                      | Fam129a       | Gpr98     | Lrp2         | Ptpn13                                            | Trim25    | Gm15340       |          |
| Ccl7                                                       | Gm6482       | Mob3c         | Traf1    | Apol10b                      | Fap           | Gsg1      | Lta          | Ptpre                                             | Trim26    | Gm15863       |          |
| Ccn1                                                       | Gm7945       | Mx1           | Trex1    | Apol8                        | Fbxl2         | Gvin1     | Lypd6b       | Pydc3                                             | Trim30a   | Gm8005        |          |
| Ccr12                                                      | Gm8220       | Mx2           | Trim12a  | Apon                         | Fbxo15        | H2-BI     | Maff         | Pyhin1                                            | Trim30b   | Gm9694        |          |
| Cd274                                                      | Gm8232       | Myc           | Trim21   | Arc                          | Fgd4          | H2-D1     | Mageb2       | Rab8b                                             | Trim56    | Gm9758        |          |
| Cd44                                                       | Gm8247       | Mylk          | Trim30c  | Arhgef3                      | Foxf1a        | H2-K1     | Mapt         | Rad23b                                            | Trim6     | Gpr119        |          |
| Cd52                                                       | Gm9706       | Neur13        | Trim30d  | Arl5c                        | Fpr2          | H2-K2     | March11      | Rasl11b                                           | Tspan33   | Hist1h2ba     |          |
| Cd74                                                       | Grlh1        | Nfkbia        | Trim34a  | Armcx6                       | Fzd5          | H2-M11    | Mep1a        | Rbmy1a1                                           | U6atac    | Hist2h4       |          |
| Cd83                                                       | H2-M2        | Nfkbie        | Trim5    | Asap3                        | Gabrp         | H2-M3     | Mir101a      | Rdh5                                              | Uba7      | Hivep2        |          |
| Celf3                                                      | Has2         | Nfkbiz        | Trim69   | Ascc3                        | Gadd45g       | H2-M9     | Mitd1        | Rel                                               | Ubd       | Hspbap1       |          |
| Cish                                                       | Hdc          | Niacr1        | Trpm1    | Atp8b3                       | Gata3         | H2-Q1     | Milki        | Rfx5                                              | Unc80     | Ier2          |          |
| Cmpk2                                                      | Herc6        | Nr1h5         | Txnip    | B230307C23Rik                | Gbp1          | H2-Q10    | Mov10        | Rgs22                                             | Vnn1      | Jun           |          |
| Creg2                                                      | Hist1h1c     | Nrg4          | Ube2l6   | Bai2                         | Gbp10         | H2-Q2     | Mpeg1        | Rhob                                              | Vwf       | Klk1b24       |          |
| Csf1                                                       | Hist1h2bc    | Nudt13        | Ucma     | Batf2                        | Gbp4          | H2-Q3     | Mpo          | Ripk2                                             | Wdfy4     | Lag3          |          |
| Csf2                                                       | Hist1h2bg    | Oas1a         | Usp-ps   | BB157357                     | Gcg           | H2-Q5     | Msc          | Rnasel                                            | Zbp1      | Lmcd1         |          |
| Csrnp1                                                     | Hist1h2bp    | Oas1b         | Usp17l5  | BC005561                     | Gdap10        | H2-Q6     | Mtmr7        | Rnaset2a                                          | Zbtb10    | LOC402769     |          |
| Cxcl1                                                      | Hist1h2bq    | Oas1c         | Usp18    | BC016423                     | Gdf15         | H2-T10    | Myd88        | Rnf19b                                            | Zbtb3     | LOC641136     |          |
| Cxcl10                                                     | Hist1h3g     | Oas1f         | Vcam1    | BC023105                     | Gdnf          | H2-T22    | Myom1        | Rnf31                                             | Zbtb5     | Lrrc30        |          |
| Cxcl16                                                     | Hist1h4i     | Oas1g         | Xaf1     | BC057022                     | Glis3         | H2-T23    | N4bp1        | RP23-53N8.2                                       | Zc3h6     | Lrrc3b        |          |
| Cxcl2                                                      | Hist1h4m     | Oas2          | Zc3hav1  | BC061194                     | Glp2r         | Hfm1      | Naip6        | S1pr1                                             | Zfhh4     | Madcam1       |          |
| Cyp26a1                                                    | Hist2h2aa2   | Oas1          | Zfp36    | BC100530                     | Gm10092       | Hist1h1d  | Nceh1        | Scn10a                                            | Zfp202    | Map3k8        |          |
| Cyp26b1                                                    | Hist2h2bb    | Oas2          | Zfp945   | Bcl2l11                      | Gm106         | Hist3h2ba | Nckap1l      | Sema5b                                            | Zfp296    | Mcoln1        |          |
| D14Erd668e                                                 | Hist2h3c2-ps | Ovol1         | Zmynd15  | Bglap-rs1                    | Gm10775       | Hkdc1     | Ndrgr1       | Serpinb9c                                         | Zfp382    | Mfsd6l        |          |
| D730045A05Rik                                              | Hist3h2a     | Parp10        | Znf1     | Bglap2                       | Gm10839       | Hmha1     |              | Serpinb9d                                         | Zfr2      | Myo18b        |          |
|                                                            |              |               |          | Bmyc                         | Gm11127       | Hmox1     |              | Sfxn2                                             | Zmynd12   | Nfkbid        |          |
|                                                            |              |               |          |                              | Gm11435       | Hoxb5     |              |                                                   | Zufsp     |               |          |

Lists of genes found statistically up-regulated in WT and GADD34<sup>ΔC/ΔC</sup> MEFs upon HMW poly(I:C) treatment during 6h as compared to their untreated counterparts. Probes were classified with Venn diagram. 257 genes were up-regulated in both WT and GADD34<sup>ΔC/ΔC</sup> MEFs, 391 were only up-regulated in WT and 97 only in GADD34<sup>ΔC/ΔC</sup> MEFs.

## Appendix Table S2

| Genes upregulated only in WT (vs ATF4 <sup>-/-</sup> ) MEFs upon tunicamycin |               |               |               |               |               |
|------------------------------------------------------------------------------|---------------|---------------|---------------|---------------|---------------|
| Car6                                                                         | 4932422M17Rik | Osbpl2        | Hagh          | Dym           | Asph          |
| Derl3                                                                        | Gpt2          | 4930431P03Rik | Dusp18        | Usp31         | Ppiib         |
| Cox6a2                                                                       | Rab38         | Slc5a6        | Erlin1        | Rrbp1         | D6Wsu116e     |
| Acox2                                                                        | S100a7a       | Lims2         | Camk1         | Gm10734       | Gtf2a1        |
| Csn3                                                                         | Mtm1          | 2610528E23Rik | 2210008F06Rik | 1810010H24Rik | Cyb5b         |
| Slc6a12                                                                      | Sbtd1         | Klra5         | Kctd4         | MLlt4         | Zfp945        |
| Angptl6                                                                      | Slc7a1        | Tmcc3         | Camk1d        | Cdv3          | Pusl1         |
| 2310002L13Rik                                                                | Ptrh1         | Sft2d2        | Tle1          | Plcx2         | Ssr4          |
| Chchd10                                                                      | Shmt2         | XM_124146     | Uprt          | Ahnak         | Gpr85         |
| Soat2                                                                        | NAP112914-1   | Mapk6         | Serpib9g      | Tmem97        | A630033H20Rik |
| Slc6a9                                                                       | Chka          | Slc1a5        | Otud1         | Ddr2          | Aup1          |
| Chac1                                                                        | Gtpbp2        | Mthfd2        | Pard3         | Mtdh          | 2310046K23Rik |
| B4galnt2                                                                     | Hoxa1         | Fam195a       | Xpot          | Eif1a         | 4732491K20Rik |
| Odz4                                                                         | Areg          | Eps8          | 2310058N22Rik | Sertad2       | Mal           |
| Cth                                                                          | Clic5         | Cobl          | Arhgap33      | Atp2a2        | Gale          |
| Tacr2                                                                        | Dhrs9         | Tbp1          | Coasy         | Pard6a        | A630012P03Rik |
| Cnfn                                                                         | 5330431K02Rik | Sh3bgrl2      | Slc43a3       | Nfkbib        | Hs1bp3        |
| Avil                                                                         | Firt3         | Gpr124        | Svip          | Timm8a1       | Kdm6a         |
| Cdsn                                                                         | Ppef1         | Dpysl3        | Lrrc8b        | Gtf2h1        | Thyn1         |
| Gm10639                                                                      | Gpr137b-ps    | Akna          | 2700007P21Rik | Rnh1          | Gnat2         |
| Gpr137b                                                                      | Sh3tc2        | Them4         | Mfsd11        | LOC100044193  | Camk2d        |
| Fgf21                                                                        | Sgcd          | Nars          | Bcl2l1        | Gls           | Fip1l1        |
| Msln                                                                         | Mamdc2        | Aap5          | Tcea1         | Slc26a6       | Gm13238       |
| Tmem179                                                                      | Asns          | XM_485592     | BC022687      | Slc2a5        | Klk10         |
| Vipr2                                                                        | Dennd4a       | Slc25a29      | Slc25a37      | Ahi1          | 2210011C24Rik |
| Cyb5r2                                                                       | Kcnt2         | Gm12060       | Zfand2a       | Lym4          | Cln6          |
| Akr1b7                                                                       | Mei4          | Stt3b         | Gmppb         | Bend6         | Ogt           |
| Sh2d6                                                                        | Phgdh         | Ormdl2        | Calcb         | Zbtb7b        | Kcnma1        |
| Gm3776                                                                       | Aig1          | Mpp6          | Stard5        | Sphk2         | Mrps18b       |
| Stc2                                                                         | Cpeb1         | Amot1         | Pck2          | Mtss1         | Fads2         |
| Tmem47                                                                       | Renbp         | Zfp57         | 1810029B16Rik | Slc35c2       | 4922501C03Rik |
| Gm8709                                                                       | Mtap1b        | Larp1b        | Insig1        | Crebl2        | H2-M10.3      |
| Fibin                                                                        | Ecel1         | Siah2         | Sh3bp2        | LOC100504608  | Far1          |
| Adm2                                                                         | Klrg2         | XM_910588     | Cebpg         | Twistnb       | Nnmt          |
| Nrcam                                                                        | Gm129         | Atp6v0b       | AK086332      | AA467197      | Pppde2        |
| Amz1                                                                         | Lck           | Cars          | B3gnt2        | Tmem60        | Cgrrf1        |
| Slc4a11                                                                      | NAP111644-1   | Gsta2         | 9130230N09Rik | Eif3c         | Try5          |
| Myom2                                                                        | Slc25a33      | Hdac4         | Lrrc16a       | Jdp2          | Pacs2         |
| Ttc9                                                                         | Pyhin1        | NAP112102-1   | Samd12        | Cpeb2         | Rasal1        |
| Cyb5r1                                                                       | Nfxl1         | Atp2a3        | Avpi1         | Lrrfip1       | Ube2j1        |
| Gadd45a                                                                      | Dusp5         | 1110018J18Rik | Lins          | 4932412D23Rik | Eps15         |
| Aldh1l2                                                                      | Prkg2         | Gm11595       | Sco2          | 5430411K18Rik | Scpep1        |
| Ndrp1                                                                        | Rtn4r         | Fez1          | AK5           | Cds2          | 0610007P14Rik |
| Tmem184a                                                                     | Ascc2         | Tspan15       | Lamb3         | Plcg2         | 4932425I24Rik |
| Ppp1r15a                                                                     | Cr1l          | Duoxa1        | Slc38a1       | Mdfic         | Mtap6         |
| Cyp3a13                                                                      | Fads3         | Akap2         | Pde10a        | Deb1          | Hax1          |
| Wars                                                                         | Lonrf3        | Slc38a7       | Slc39a11      | XM_909351     | Ciapin1       |
| Sspo                                                                         | Mtap2         | BC052688      | Cspg4         | Krtap4-8      | Gcnt1         |
| Atad3a                                                                       | Ptpn22        | Kprp          | Uap1l1        | Uqcrq         | D13Ert608e    |
| Fam171b                                                                      | Abca8b        | Rps6ka2       | Entpd5        | Mettl22       | Slc25a38      |
| Ercc1                                                                        | Gcat          | Ostn          | Socs2         | Gm7303        | Cln8          |
| Mfsd2a                                                                       | Slc33a1       | Tead4         | Crls1         | Lars          | NAP060966-1   |
| Gm8096                                                                       | NAP114398-1   | Meis2         | Csnk2b        | Rdh11         | 4930438A08Rik |
| Tbc1d2                                                                       | Rnf39         | Gm2016        | Plagl1        | Hapln4        | Hspa13        |
| Itpr2                                                                        | Emp2          | Ank2          | NAP112224-1   | Lphn3         | Lman2         |
| Lpin3                                                                        | Rab39b        | Gsto1         | Slc35e4       | A330009N23Rik | Cdr2l         |
| Pla2g12a                                                                     | Vat1          | Arl5b         | Srpb          | Timm10        | Det1          |
| Tigit                                                                        | 0610010O12Rik | Klra22        | Clptm1l       | 0610007L01Rik | Tmem181a      |
| 4930506M07Rik                                                                | Tmeff2        | Slc20a1       | Srm           | Pqlc2         | D030028A08Rik |
| Reep6                                                                        | 1700016K19Rik | Recql4        | Ipo7          | Klf8          | Parvb         |
| Itgb7                                                                        | Slc35f2       | LOC236220     | Als2cl        | P2rx3         | Agpat5        |
| Perp                                                                         | Hmox1         | Ass1          | Hspa9         | Lass6         | Tom1          |
| H2-M10.1                                                                     | Gnpnat1       | Pvr           | Pecr          | Tns3          | 1110067D22Rik |
| Pax8                                                                         | Epha2         | Rnf185        | Ece2          | Trio          | Slc36a1       |
| Cyp2c44                                                                      | Plk3          | Suox          | Tymp          | Yipf6         | Sec14l1       |
| Klf5                                                                         | Spcc3         | Fam110c       | Tnfaip2       | Cyld          | Trappc8       |
| Slc7a11                                                                      | Gm2694        | Phf10         | Lonp1         | Pcca          | Zdhhc21       |
| Wfs1                                                                         | Esy2          | Ghitm         | Tmem192       | Mbtps2        | Klra6         |
| Psph                                                                         | Cpox          | Tmem202       | Tmem209       | Faf1          | Pvrl1         |
| Sybu                                                                         | Ngef          | Sars          | Eef2k         | Gm9079        | Grpel2        |
| Plcl2                                                                        | Mertk         | Stau2         | Atf6          | Serpib9c      | BC048403      |
| Ppm1h                                                                        | Mid1ip1       | Ccdc47        | Eif5          | Eif4g3        | Jagn1         |
| Acot2                                                                        | Strbp         | Yrdc          | Unc5c         | Socs6         | Dnaja3        |
| Gch1                                                                         | Gdap1l1       | Eprs          | Qdpr          | Dgkd          | Tm2d3         |
| Ptchd1                                                                       | Oxsr1         | Scfd2         | Tmem206       | Zyg11b        | Ssfa2         |
| Eif4ebp1                                                                     | Hs3st5        | Reep3         | Rbm15b        | Fut1          | Imp3          |
| Slc7a3                                                                       | Rpp25         | Ttl11         | Lrp8          | LOC100504857  | Fam185a       |
| Hmx3                                                                         | Paqr3         | Sgsm1         | Snd1          | Gfpt1         | Krtcap2       |
| Nrip2                                                                        | Npc1          | Tmem120a      | Rwdd4a        | 2810432L12Rik | Homer1        |
| Extl1                                                                        | Aldh18a1      | Ccnd2         | Mvd           | Pkp1          | Cdc42se2      |
| Atf3                                                                         | Sqstm1        | Scly          | Slc17a9       | Tspyl2        | Lnp           |
| Lce1c                                                                        | Sgms2         | Tmem74        |               |               |               |

ATF4 gene expression signature represents the genes that were found up-regulated in WT and not in ATF4<sup>-/-</sup> MEFs upon tunicamycin during 12h as compared to their untreated counterparts. This list was generated from available public genomic data (GSE49598).

## Supplementary Materials and Methods

### *Microarray analyses*

Equal amounts of RNA extract (200 ng) from each replicate were amplified and Cy3 labeled using the Low Input Quick Amp Labeling kit (Agilent Technologies). Hybridizations were performed according to the manufacturer's instructions for One-Color Microarray-Based Gene Expression Analysis using SurePrint G3 Mouse Gene Expression v2 Microarrays (Agilent Technologies). Images were scanned on an Agilent G2505C microarray scanner, and raw images were quantified using the Agilent Feature Extraction 10.7.3.1 software and the GE1\_107\_Sep09 protocol. Raw gene expression data were background corrected using the "normexp" method and quantile normalized, using the limma package through Bioconductor in the R statistical environment (version 2.15.0). Quality control of the expression data was assessed by boxplots of raw expression data, density plots of the normalized data, and calculation of the Pearson's correlation coefficients between arrays. Genes differentially expressed between each condition were selected as having a fold change (FC) > 2x and a FDR (Benjamini-Hochberg correction) < 0.05 after statistical evaluation through the empirical Bayes method performed with the limma package. The genes that were found upregulated were sorted using Venn diagrams and the gene sets obtained were uploaded into Ingenuity Pathway Analysis (IPA) to test for significant enrichment of functional annotations.

The microarray data have been deposited in the Gene Expression Omnibus (GEO) database under accession number GSE77777. The ATF4 gene expression signature was generated using GEO (GSE49598), on WT and ATF4-deficient MEFs treated or not with tunicamycin for 12h. This ATF4 signature was composed of the genes found statistically up-regulated (FDR < 0.05; FC > 2x according to empirical Bayes method performed with the limma package) in WT MEFs upon tunicamycin treatment as compared to untreated but not found up-regulated in ATF4-deficient MEFs upon tunicamycin treatment as compared to untreated. The GSEA method was used to test whether the ATF4 signature was significantly regulated in the pairwise comparisons between WT or GADD34<sup>ΔC/ΔC</sup> MEFs treated with poly(I:C) with their untreated counterparts. Graphical output is a bar code. Each bar corresponds to the projection of one probe set of the ATF4 signature gene set on the red-to-blue gradient representing all the probe sets of the gene chip from microarrays analysis, ranked from high expression in non-treated condition to high expression in poly(I:C)-treated condition. The normalized enrichment score (NES) represents the number and differential expression intensity of the genes enriched. The NES is positive if the gene set is enriched in the condition on the left (red) and negative if it is enriched in the condition on the right (blue). The false discovery rate (FDR) is a statistical value representing the likelihood that the enrichment of the gene set represents a false-positive finding (e.g., if FDR = 0.25, a similar enrichment is found in 25% of the random gene sets used as controls). The enrichment was considered significant for FDR < 0.25, as recommended by GSEA developers.

### *ELISA*

IFN-β quantification in culture supernatant was performed using the Mouse Interferon Beta ELISA kit (PBL InterferonSource) according to manufacturer instructions.

### *Mathematical model (simplification)*

The presented mathematical model can be simplified by removing the presence of Ppp1r15a and considering only the regulation of the production of GADD34. This simplification is possible because we decided to represent the decay of the mRNA as triggered by its entering in productive engagement in the ribosome. This mRNA decay model has been chosen for its simplicity (it does not require extra parameters) and the fact it is supported by several publications. From a mathematical point of view, this simple model permits to almost ignore the effect of the production/decay of Ppp1r15a and to inject its participation directly in the equation (6). By the way, we can re-write the model equations like:

1.  $P(t) = S1(Ds(t-1))$
2.  $Tl(t) = S2(E(t-1))$
3.  $Tlg(t) = 1-Tl(t-d1)$
4.  $Gp(t) = Gp(t-1) + Tlg(t-d1) * C1 - C2$
5.  $E(t) = C3 * P(t-1) - C4 * Gp(t-d2)$

This simplified model has a behavior very similar to the previous model's one (Figure 7B). Moreover, the simulations of virtual cell dynamics does not show any qualitative difference with the ones proposed in Figure 7D. Hence, it seems possible to use this model for the study. However, since the regulation of the *Ppp1r15a* gene seems to be very important from the biological point of view, one can ask if the simplified model will permit to consider the various sources of regulation of this mRNA. For instance, the model of mRNA decay may

be changed for some other models that were discussed in literature in order to estimate their impact on the dynamics. For this study, the presence of the *Ppp1r15a* parameter in the model is therefore important.
