# Supplementary material
Source: PubMed Central journal article supplement (PMC5350567)

Figure 2B

Immublot Anti GADD34 MEF WT vs ATF4KO

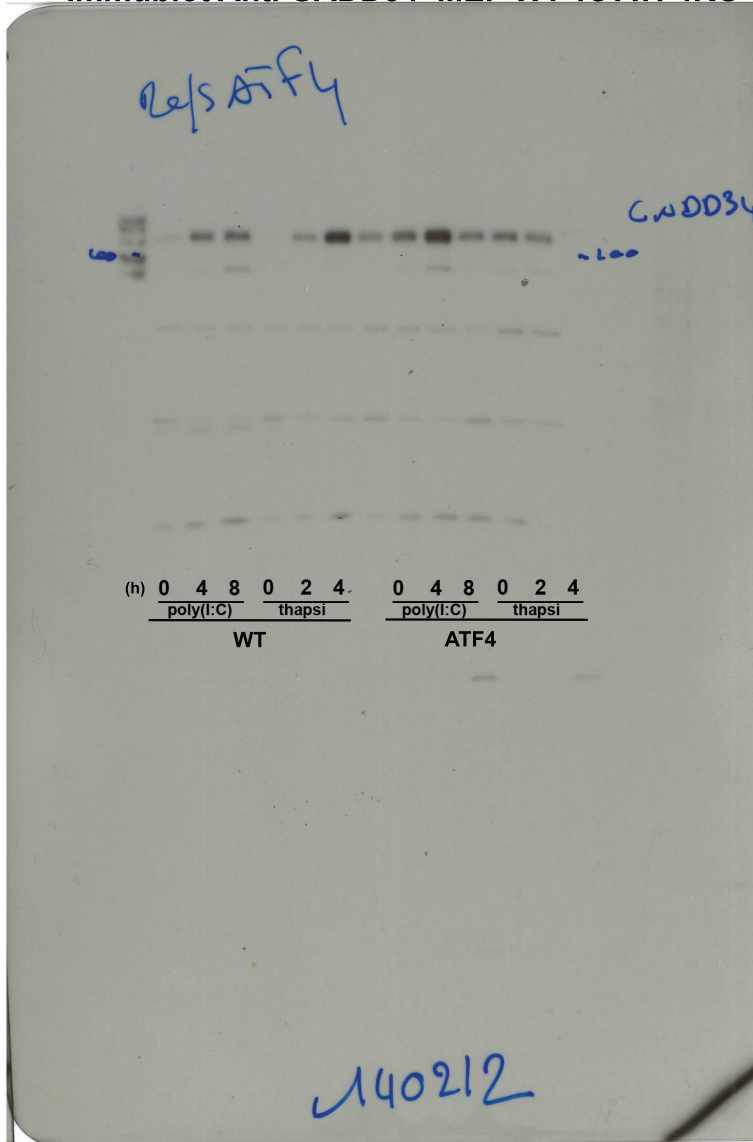

Immublot Anti Tubulin MEF WT vs ATF4KO

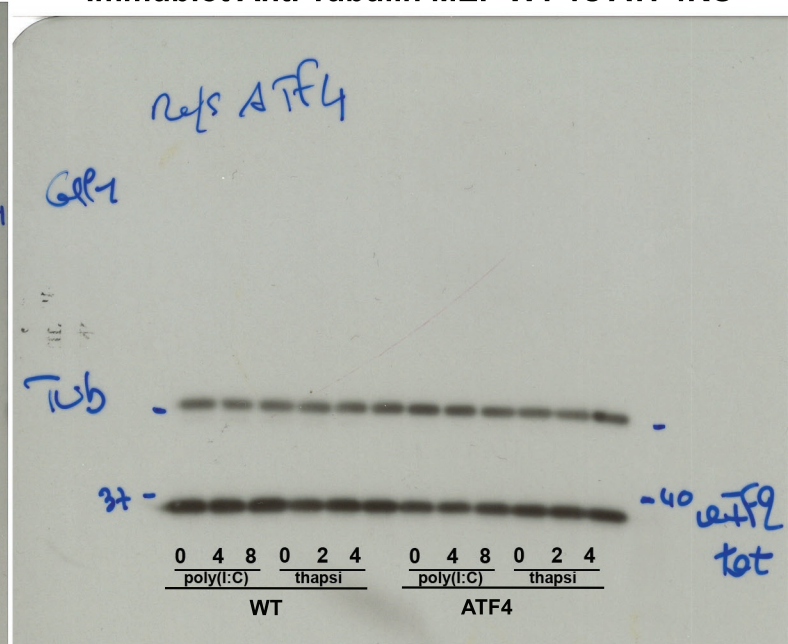

Figure 2D

Immunoblot Anti GADD34 (top) and anti-p-Elf2a (bottom)  
MEF WT vs MAVS KO

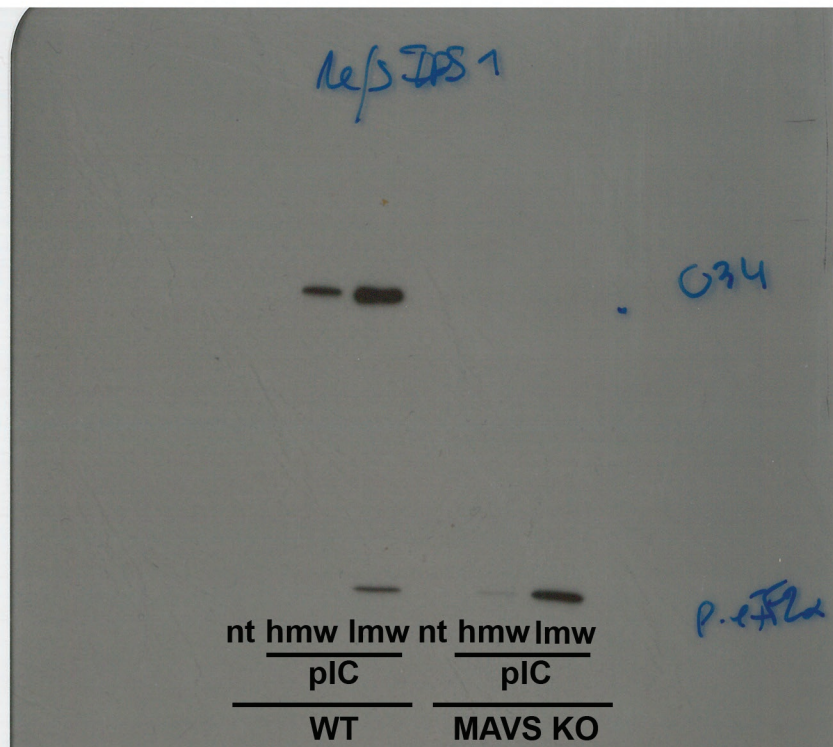

Immunoblot Anti PKR (top) and anti-b-actin (bottom)  
MEF WT vs MAVS KO

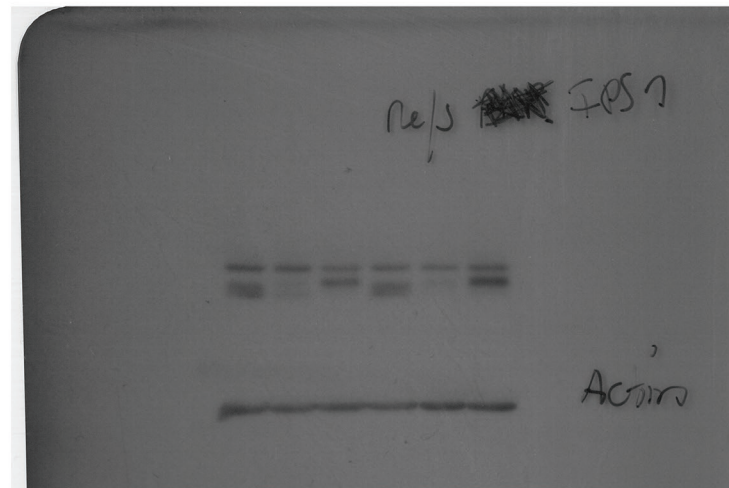

nt hmw lmw nt hmw lmw  
pIC pIC  
WT MAVS KO

Immunoblot Anti p-STAT1 (top) and anti-p-IRF3 (bottom)  
MEF WT vs MAVS KO

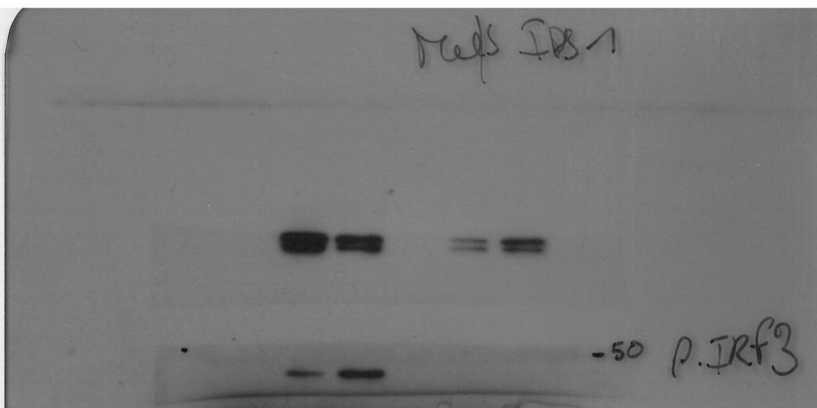

nt hmw lmw nt hmw lmw  
pIC pIC  
WT MAVS KO

Immunoblot Anti elf2a tot  
MEF WT vs MAVS KO

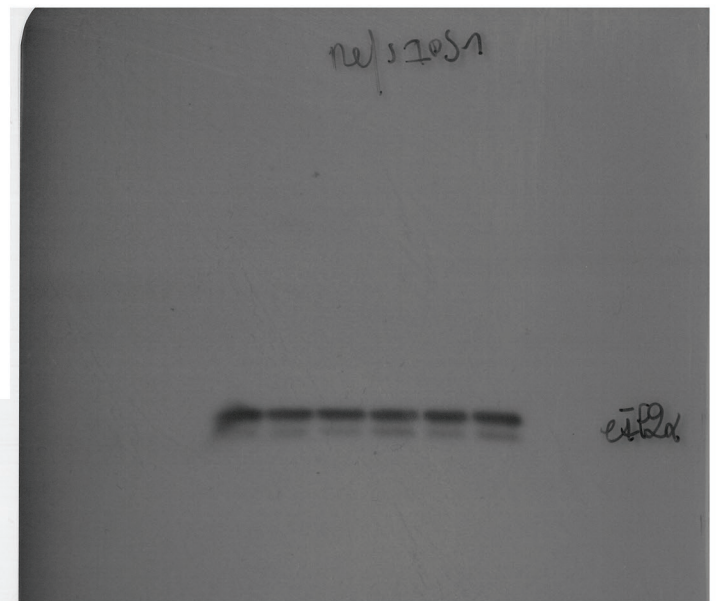

nt hmw lmw nt hmw lmw  
pIC pIC  
WT MAVS KO

Immunoblot Anti puromycin  
MEF WT vs MAVS KO

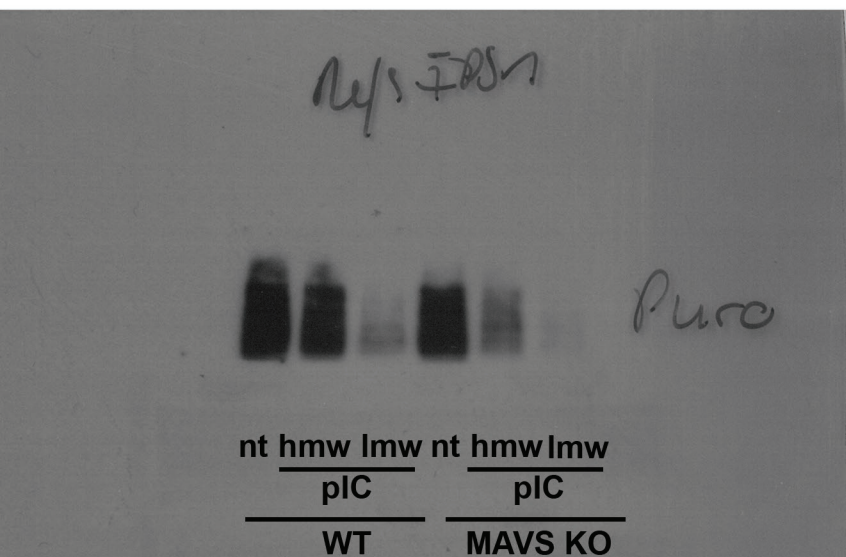

nt hmw lmw nt hmw lmw  
pIC pIC  
WT MAVS KO

Figure 2E

Immublot Anti GADD34 (top) and IRF3 (bottom)  
MEF WT vs IRF3/7 DKO

Immublot Anti  $\beta$  Actin  
MEF WT vs IRF3/7 DKO

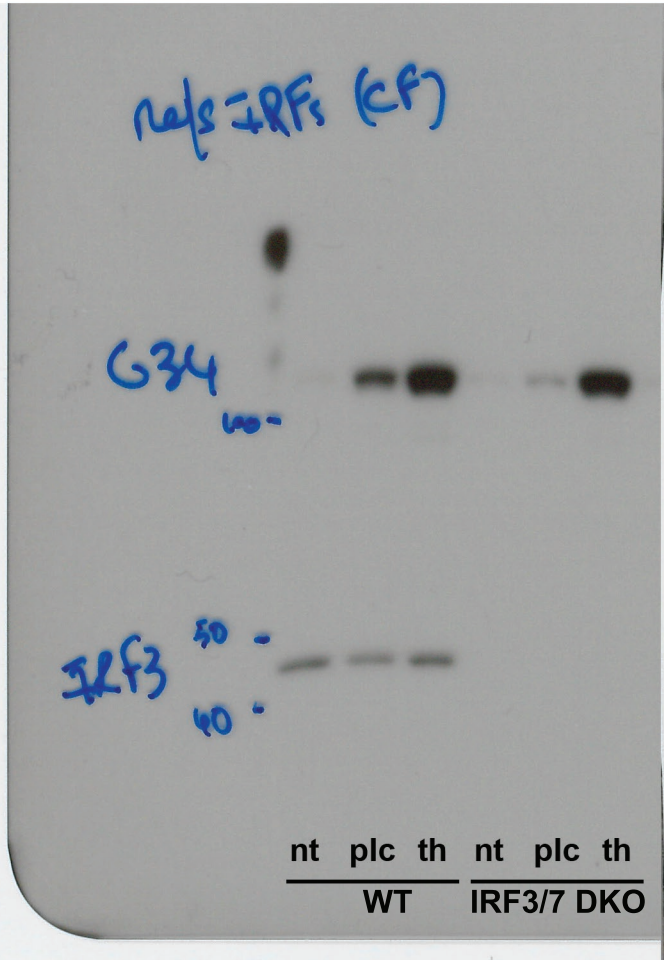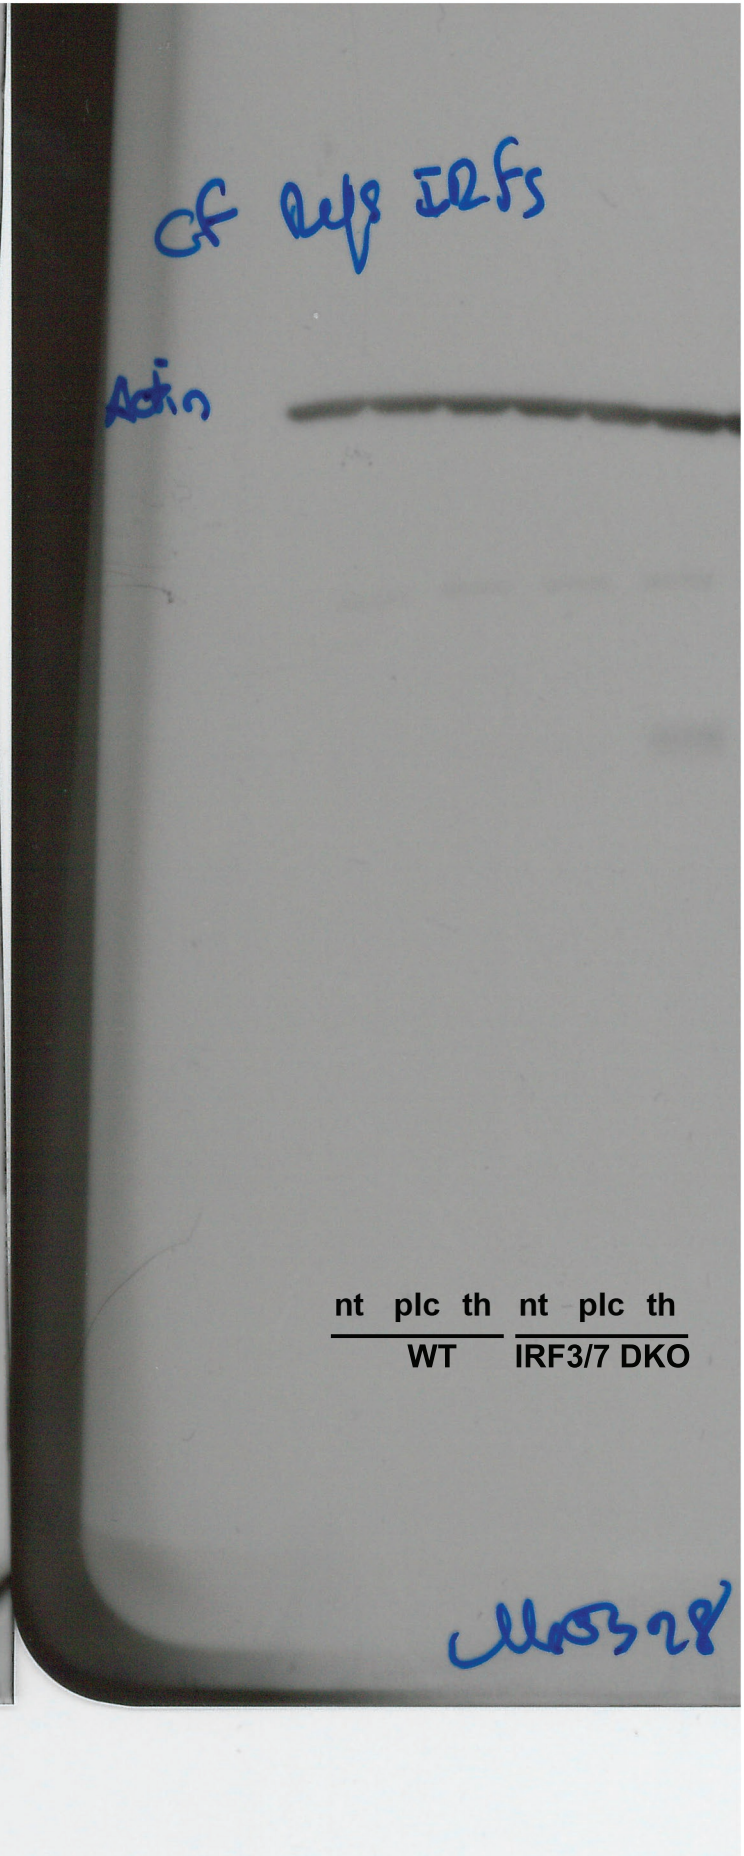

Supplement: EMBJ-36-761-s003.pdf [file EMBJ-36-761-s003.pdf]
