# Supplementary material
Source: PubMed Central journal article supplement (PMC5350567)
Supplement: EMBJ-36-761-s004.pdf [file EMBJ-36-761-s004.pdf]

Figure 3C

Immublot Anti p-TBK1 (top) and anti-puromycin (bottom)  
MEF PKR KO

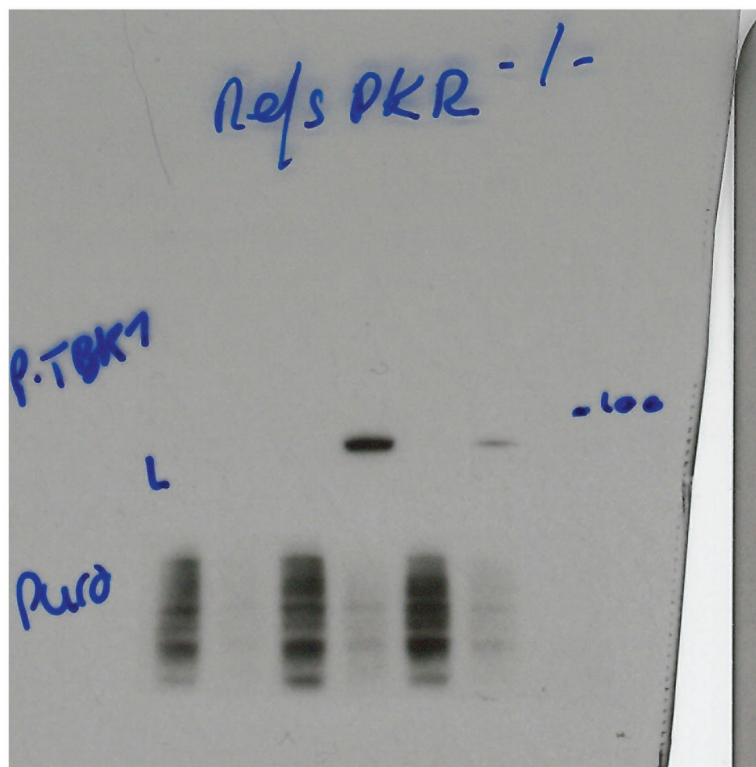

|     |    |   |         |   |         |   |
|-----|----|---|---------|---|---------|---|
| CHX | -  | + | -       | + | -       | + |
|     | nt |   | plc hmw |   | plc lmw |   |

Immublot Anti IκBα  
MEF PKR KO

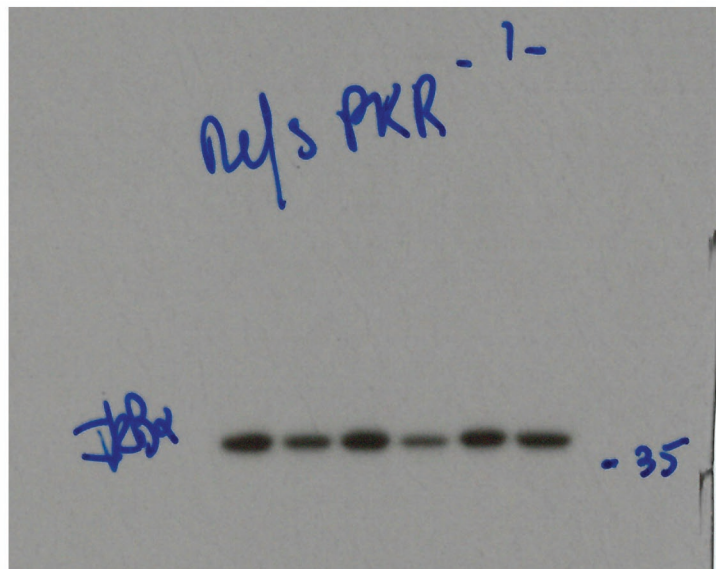

|     |    |   |         |   |         |   |
|-----|----|---|---------|---|---------|---|
| CHX | -  | + | -       | + | -       | + |
|     | nt |   | plc hmw |   | plc lmw |   |

Immublot Anti elf2a  
MEF PKR KO

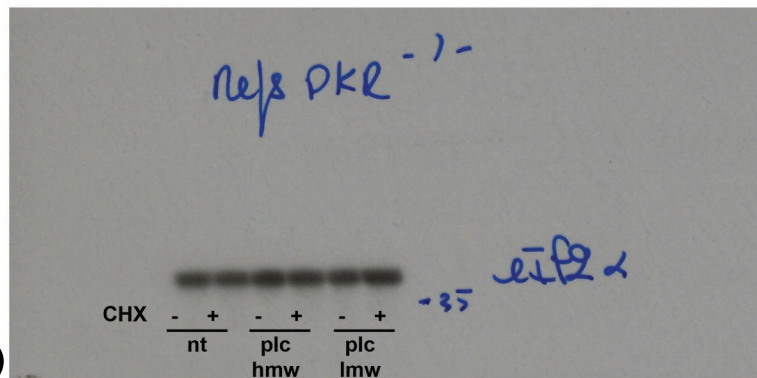

|     |    |   |         |   |         |   |
|-----|----|---|---------|---|---------|---|
| CHX | -  | + | -       | + | -       | + |
|     | nt |   | plc hmw |   | plc lmw |   |

Immublot Anti p-elf2a  
MEF PKR KO

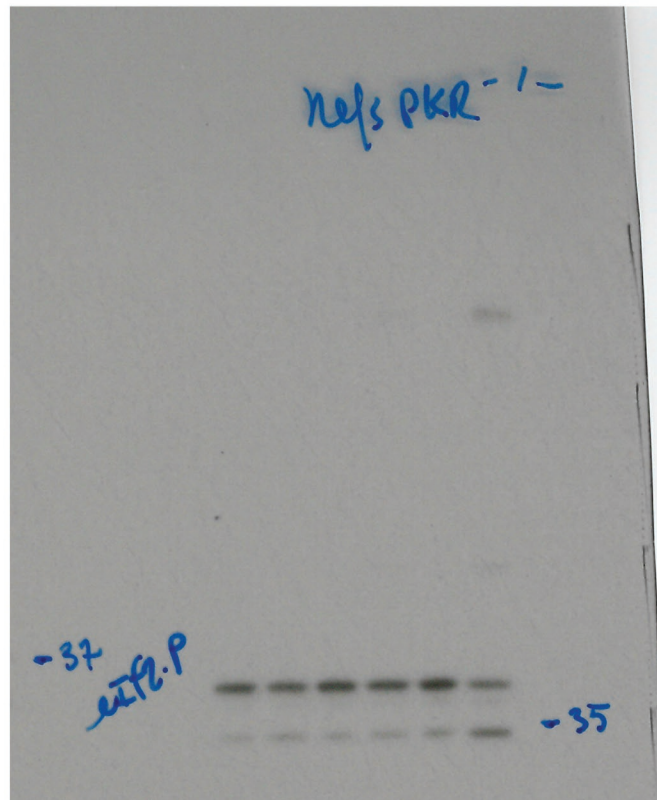

|     |    |   |         |   |         |   |
|-----|----|---|---------|---|---------|---|
| CHX | -  | + | -       | + | -       | + |
|     | nt |   | plc hmw |   | plc lmw |   |

Immublot Anti GADD34 (top) and anti-p-IRF3 (bottom)  
MEF PKR KO

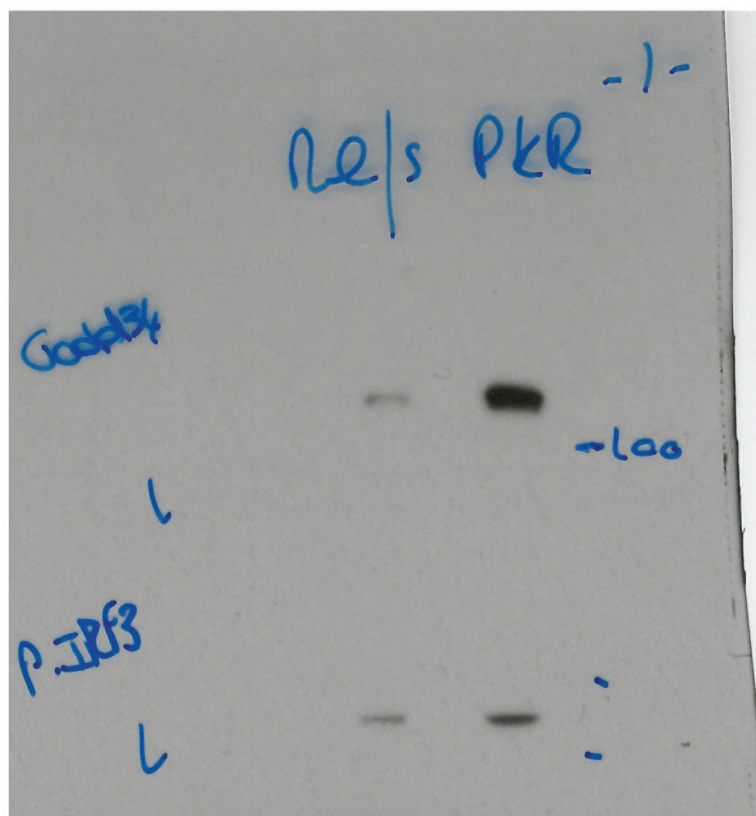

|     |    |   |         |   |         |   |
|-----|----|---|---------|---|---------|---|
| CHX | -  | + | -       | + | -       | + |
|     | nt |   | plc hmw |   | plc lmw |   |

Figure 3D

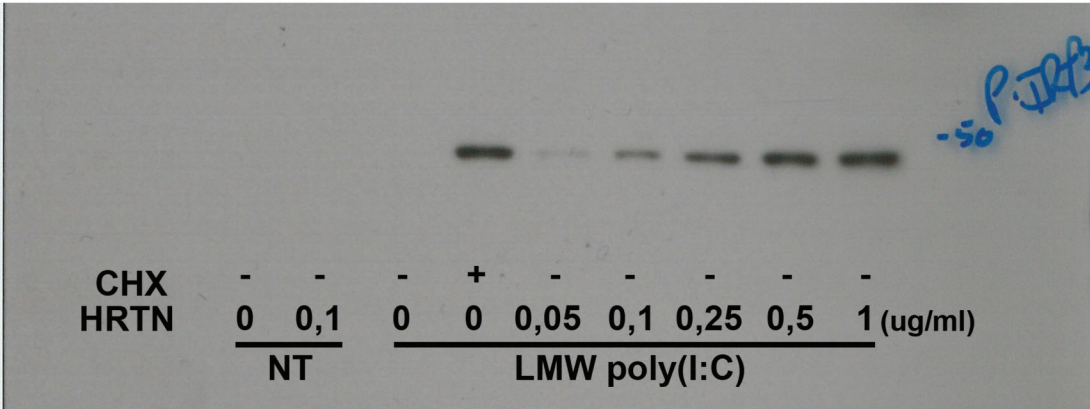

Immublot Anti p-IRF3  
MEF PKR KO

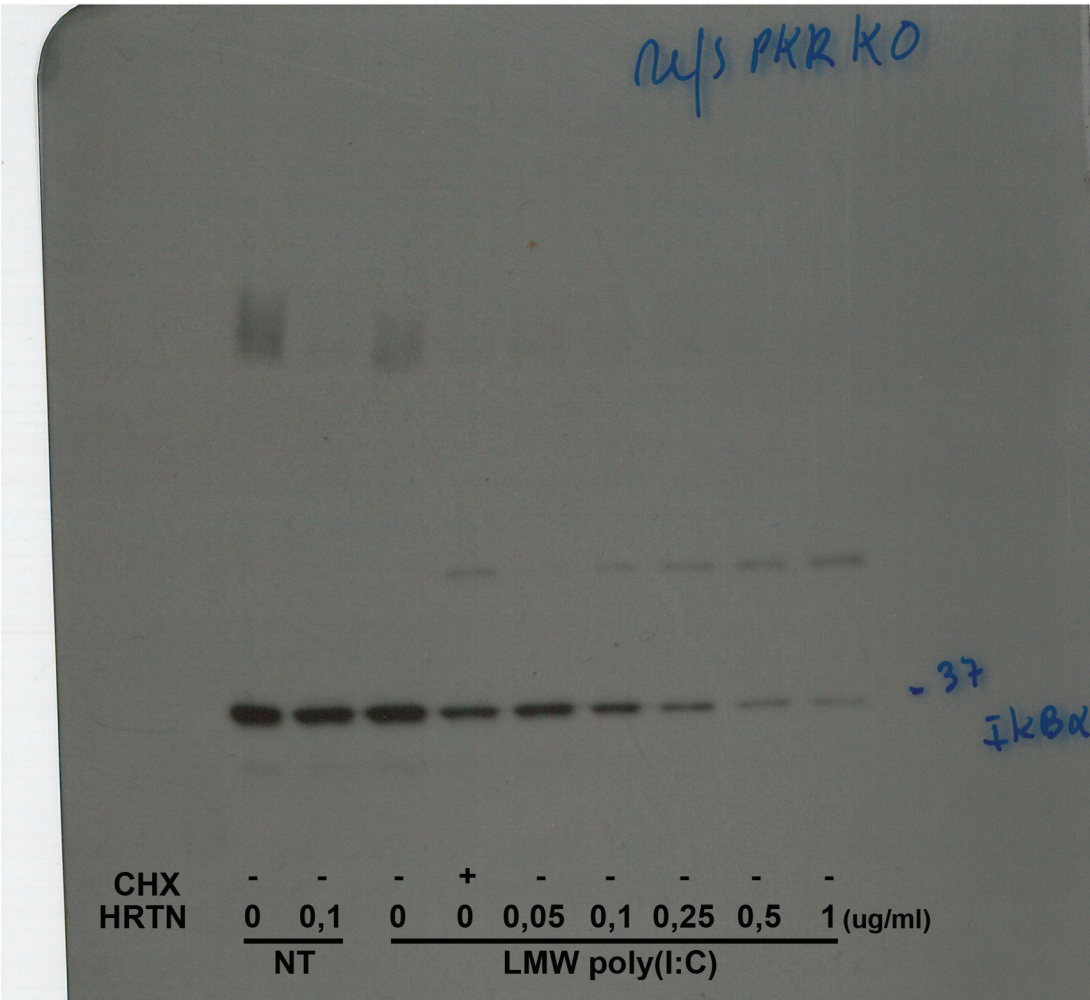

Immublot Anti IκBα  
MEF PKR KO

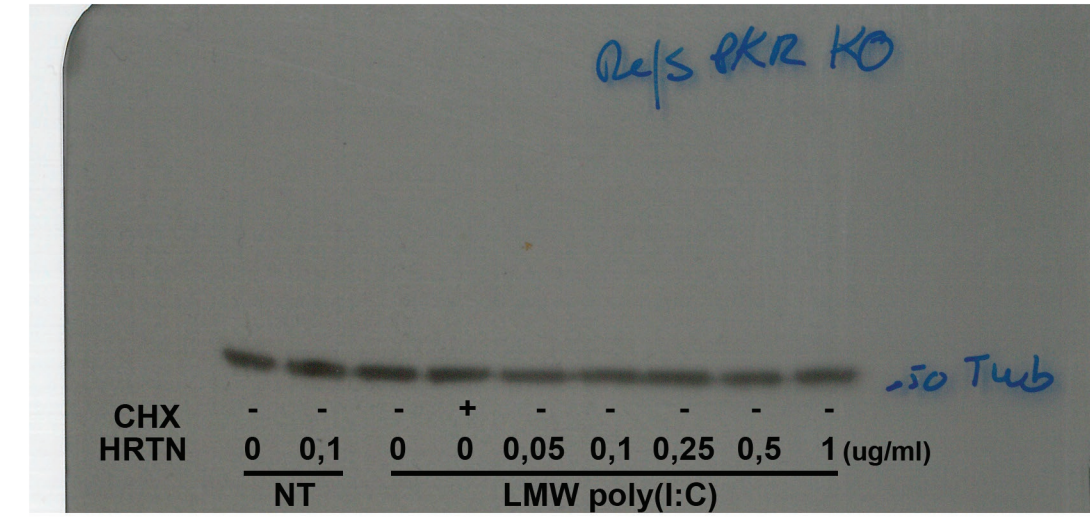

Immublot Anti tubulin  
MEF PKR KO
